# Supplementary material for: Was it worth it? Benefits of transcatheter aortic valve implantation from a patient's perspective
Source: PubMed Central journal article supplement — J Am Geriatr Soc. 2021 May 14;69(9):2605–11. doi: 10.1111/jgs.17216 (PMC8518798; doi:10.1111/jgs.17216), 2021-05-14
Supplement: JGS-69-2605-s001.pdf [file JGS-69-2605-s001.pdf]

Supplementary Table S1. Baseline characteristics of included and excluded patients

| Variable                                              | Included, n=74   | Excluded, n=26   | <i>p</i> |
|-------------------------------------------------------|------------------|------------------|----------|
| Age, mean ± SD                                        | 81.5 (5.8)       | 79.9 (6.4)       | 0.35     |
| Male, n (%)                                           | 28 (37.8)        | 14 (53.8)        | 0.16     |
| Living at home, n (%)                                 | 65 (87.8)        | 21 (80.8)        | 0.65     |
| Data missing                                          | 0                | 3                |          |
| No or only primary education, n (%)                   | 29 (39.2)        | 10 (38.5)        | 0.98     |
| Data missing                                          | 2                | 1                |          |
| Number of (i)ADL dependencies, median (IQR)           | 2.0 (1.0-4.25)   | 1.5 (0.0-5.0)    | 0.95     |
| Subjective memory complaints, n (%)                   | 24 (32.4)        | 9 (34.6)         | 0.87     |
| Data missing                                          | 1                | 0                |          |
| Dementia, n (%)                                       | 0 (0)            | 1 (3.8)          | 0.09     |
| Prior delirium, n (%)                                 | 12 (16.2)        | 5 (19.2)         | 0.73     |
| MMSE, median (IQR)                                    | 28.0 (27.0-29.0) | 27.0 (24.3-28.5) | 0.04     |
| Data missing                                          | 0                | 1                |          |
| Charlson Comorbidity Index, median (IQR)              | 2.0 (1.0-3.0)    | 2.0 (1.0-3.0)    | 0.84     |
| Active cancer, n (%)                                  | 7 (9.5)          | 4 (15.4)         | 0.41     |
| Coronary artery disease, n (%)                        | 29 (39.2)        | 16 (61.5)        | 0.05     |
| Chronic obstructive pulmonary disease, n (%)          | 24 (32.4)        | 9 (34.6)         | 0.84     |
| Diabetes mellitus, n (%)                              | 16 (21.6)        | 9 (34.6)         | 0.19     |
| Atrial fibrillation, n (%)                            | 25 (33.8)        | 11 (42.3)        | 0.44     |
| Number of prescriptions, median (IQR)                 | 8.0 (5.3-11.0)   | 8.0 (6.0-10.5)   | 0.78     |
| Logistic EuroSCORE I, median (IQR)                    | 15.0 (10.0-19.0) | 16.5 (11.0-21.9) | 0.42     |
| Left ventricular ejection fraction in %, median (IQR) | 55.0 (45.0-55.0) | 52.5 (44.3-55.0) | 0.73     |
| eGFR, mean ml/min/1.73m <sup>2</sup> (SD)             | 55.9 (15.8)      | 55.7 (18.9)      | 0.94     |

SD= Standard Deviation, ADL= Activities of Daily Living, iADL= Instrumental Activities of Daily Living, IQR= Interquartile Range, MMSE= Mini Mental State Examination
